# Supplementary material for: The evaluation of cytokines in predicting the organ injury of critically pediatric patients: a retrospective study
Source: PubMed Central journal article supplement — Transl Pediatr. 2024 Jul 25;13(7):1169–78. doi: 10.21037/tp-24-95 (PMC11320001; doi:10.21037/tp-24-95), 2024-07-25
Supplement: tp-13-07-1169-supplementary.pdf [file tp-13-07-1169-supplementary.pdf]

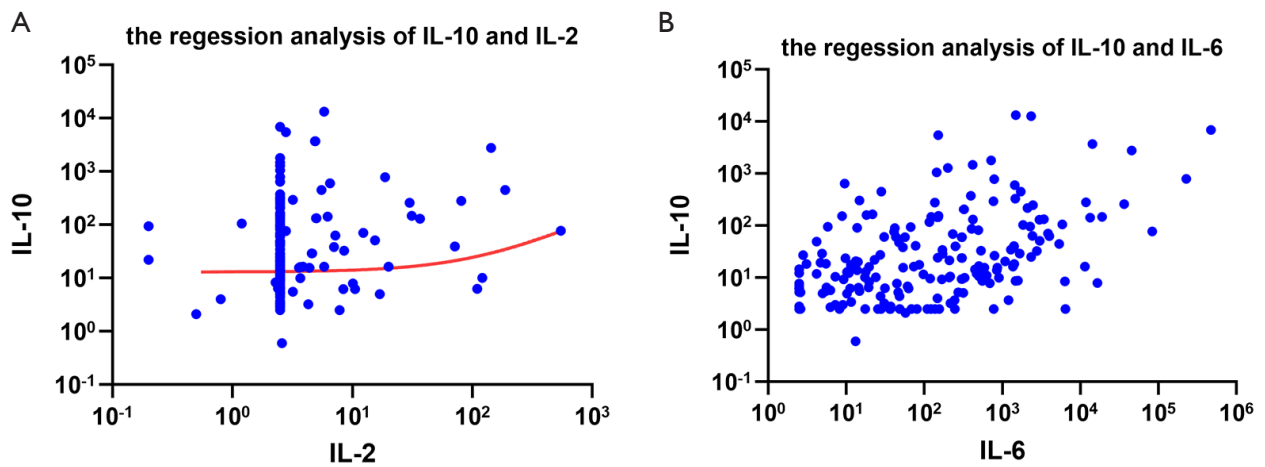

**Figure S1** Relationship between cytokines in predicting organ injury. (A) Analysis of the relationship between IL-2 and IL-10; (B) The relationship between IL-10 and IL-6. IL, interleukin.
